# Supplementary material for: A first-principles study of II–VI (II = Zn; VI = O, S, Se, Te) semiconductor nanostructures
Source: Royal Society of Chemistry journal article supplement (doi:10.1039/c2jm33744d), 2012-01-01

## SUPPORTING INFORMATION

*A First-Principles Study of II-VI (II = Zn; VI = O, S, Se, Te) Semiconductor Nanostructures*

Jon M. Azpiroz,<sup>\*,a</sup> Ivan Infante,<sup>a</sup> Xabier Lopez<sup>a</sup> and Jesus M. Ugalde<sup>a</sup>

<sup>a</sup>Kimika Fakultatea, Euskal Herriko Unibertsitatea (UPV/EHU) and Donostia International Physics Center (DIPC), P.K. 1072 Donostia, Euskadi, Spain

Filippo De Angelis<sup>b</sup>

<sup>b</sup>Istituto CNR di Science e Tecnologie Molecolari (ISTM-CNR), c/o Dipartimento di Chimica, Università degli Studi di Perugia, Via Elce di Sotto 8, I-06123, Perugia, Italy

Table 1: Geometric parameters of the ZnS-NR1 optimized at different levels. Bond lengths and angles are given. The numbers in parentheses mean the coordination number of each atom. Notice that Zn-S bond lengths are only 0.01 Å shorter at PBE/DZ as compared to B3LYP/DZ. Likewise, the bond angles are quite similar. The structure changes only slightly when the implicit solvent is introduced, irrespective of the functional. Moreover, it seems that the polarity of the solvent plays a minor role.

|                       | B3LYP/DZ | COSMO(water)-B3LYP/DZ | PBE/DZ | COSMO(water)-PBE/DZ | COSMO(acetonitrile)-PBE/DZ |
|-----------------------|----------|-----------------------|--------|---------------------|----------------------------|
| d(Zn(2)-S)            | 2.294    | 2.303                 | 2.294  | 2.300               | 2.299                      |
| d(S(2)-Zn)            | 2.313    | 2.346                 | 2.300  | 2.330               | 2.326                      |
| d(Zn(3)-S)            | 2.433    | 2.425                 | 2.418  | 2.410               | 2.411                      |
| d(S(3)-Zn)            | 2.432    | 2.424                 | 2.418  | 2.410               | 2.412                      |
| $\alpha$ (S-Zn(2)-S)  | 161.9    | 152.7                 | 163.6  | 155.6               | 155.3                      |
| $\alpha$ (Zn-S(2)-Zn) | 82.8     | 84.6                  | 81.9   | 83.9                | 84.1                       |
| $\alpha$ (S-Zn(3)-S)  | 116.5    | 117.4                 | 117.5  | 118.3               | 118.4                      |
| $\alpha$ (Zn-S(3)-Zn) | 95.5     | 96.6                  | 93.7   | 94.8                | 94.8                       |

Table 2: Electronic parameters calculated for the ZnX-NRs (X = S, Se, Te), in eV.  $d$  is the position of the  $d$  peak.  $\epsilon_{HOMO-1}$ ,  $\epsilon_{HOMO}$ ,  $\epsilon_{LUMO}$ , and  $\epsilon_{LUMO+1}$  are the HOMO-1, HOMO, LUMO and LUMO+1 KS eigenvalues, respectively.  $\Delta_d$  refers to the binding energy of the  $d$  peak, taken with respect to the VBM (the HOMO-1 in our case).  $\Delta_{HOMO-LUMO}$ ,  $\Delta_{HOMO-1-LUMO}$  and  $\Delta_{LUMO-LUMO+1}$  are the HOMO-LUMO, HOMO-1-LUMO and LUMO-LUMO+1 energy gaps. Results obtained at PCM-B3LYP/def2-SVP//PBE/DZ.

| ZnS | $d$    | $\epsilon_{HOMO-1}$ | $\epsilon_{HOMO}$ | $\epsilon_{LUMO}$ | $\epsilon_{LUMO+1}$ | $\Delta_d$ | $\Delta_{HOMO-LUMO}$ | $\Delta_{HOMO-1-LUMO}$ | $\Delta_{LUMO-LUMO+1}$ |
|-----|--------|---------------------|-------------------|-------------------|---------------------|------------|----------------------|------------------------|------------------------|
| NR1 | -14.80 | -6.78               | -6.21             | -1.24             | -0.64               | 8.02       | 4.97                 | 5.54                   | 0.60                   |
| NR2 | -14.76 | -6.77               | -6.20             | -1.28             | -0.93               | 7.99       | 4.92                 | 5.49                   | 0.35                   |
| NR3 | -14.75 | -6.71               | -6.20             | -1.30             | -1.08               | 8.04       | 4.90                 | 5.41                   | 0.22                   |
| NR4 | -14.73 | -6.65               | -6.20             | -1.28             | -1.14               | 8.08       | 4.92                 | 5.37                   | 0.14                   |
| NR5 | -14.72 | -6.63               | -6.20             | -1.30             | -1.19               | 8.09       | 4.90                 | 5.33                   | 0.11                   |

| ZnSe | $d$    | $\epsilon_{HOMO-1}$ | $\epsilon_{HOMO}$ | $\epsilon_{LUMO}$ | $\epsilon_{LUMO+1}$ | $\Delta_d$ | $\Delta_{HOMO-LUMO}$ | $\Delta_{HOMO-1-LUMO}$ | $\Delta_{LUMO-LUMO+1}$ |
|------|--------|---------------------|-------------------|-------------------|---------------------|------------|----------------------|------------------------|------------------------|
| NR1  | -14.97 | -6.64               | -6.08             | -1.31             | -0.77               | 8.33       | 4.77                 | 5.33                   | 0.54                   |
| NR2  | -14.93 | -6.51               | -6.07             | -1.34             | -1.02               | 8.42       | 4.73                 | 5.17                   | 0.32                   |
| NR3  | -14.91 | -6.42               | -6.07             | -1.35             | -1.15               | 8.49       | 4.72                 | 5.07                   | 0.20                   |
| NR4  | -14.90 | -6.37               | -6.06             | -1.36             | -1.22               | 8.53       | 4.70                 | 5.01                   | 0.14                   |
| NR5  | -14.89 | -6.35               | -6.07             | -1.36             | -1.26               | 8.54       | 4.71                 | 4.99                   | 0.10                   |

| ZnTe | $d$    | $\epsilon_{HOMO-1}$ | $\epsilon_{HOMO}$ | $\epsilon_{LUMO}$ | $\epsilon_{LUMO+1}$ | $\Delta_d$ | $\Delta_{HOMO-LUMO}$ | $\Delta_{HOMO-1-LUMO}$ | $\Delta_{LUMO-LUMO+1}$ |
|------|--------|---------------------|-------------------|-------------------|---------------------|------------|----------------------|------------------------|------------------------|
| NR1  | -15.10 | -6.26               | -5.78             | -1.29             | -1.11               | 8.84       | 4.49                 | 4.97                   | 0.18                   |
| NR2  | -15.06 | -6.13               | -5.77             | -1.31             | -1.12               | 8.93       | 4.46                 | 4.82                   | 0.19                   |
| NR3  | -15.05 | -6.06               | -5.77             | -1.33             | -1.15               | 8.99       | 4.44                 | 4.73                   | 0.18                   |
| NR4  | -15.04 | -6.01               | -5.77             | -1.33             | -1.21               | 9.03       | 4.44                 | 4.68                   | 0.12                   |
| NR5  | -15.03 | -6.00               | -5.77             | -1.35             | -1.25               | 9.03       | 4.42                 | 4.65                   | 0.10                   |

Table 3: Valence excitation spectrum of the ZnS-NRs. Vertical excitation energy and corresponding oscillator strength are reported, along with the composition of the excited state. Among the low lying excitations, the first an those with  $f > 0.1$  are shown Energies in eV and oscillator strengths in a.u.. Results obtained at PCM-B3LYP/def2-SVP//PBE/DZ.

| ZnS    |            |        |        |                      |      |            |        |
|--------|------------|--------|--------|----------------------|------|------------|--------|
| #      | Transition | E(eV)  | f      | Main Monoexcitations |      | Weight (%) |        |
| NR1    | 1          | 4.15   | 0.0968 | HOMO                 | →    | LUMO       | 72     |
|        |            |        |        | HOMO                 | →    | LUMO+1     | 22     |
|        | 7          | 4.89   | 0.3192 | HOMO-4               | →    | LUMO       | 42     |
|        |            |        |        | HOMO-6               | →    | LUMO       | 24     |
|        | 11         | 5.02   | 0.2246 | HOMO-9               | →    | LUMO       | 40     |
| HOMO-6 |            |        |        | →                    | LUMO | 38         |        |
| NR2    | 1          | 4.18   | 0.1174 | HOMO                 | →    | LUMO+1     | 44     |
|        |            |        |        | HOMO                 | →    | LUMO       | 42     |
|        | 2          | 4.64   | 0.6582 | HOMO-1               | →    | LUMO       | 72     |
|        |            |        |        | 8                    | 4.77 | 0.6301     | HOMO-3 |
|        | HOMO-4     | →      | LUMO   |                      |      |            | 18     |
|        | HOMO-1     | →      | LUMO   |                      |      |            | 16     |
| HOMO-7 | →          | LUMO   | 12     |                      |      |            |        |
| NR3    | 1          | 4.17   | 0.1234 | HOMO                 | →    | LUMO+1     | 48     |
|        |            |        |        | HOMO                 | →    | LUMO       | 24     |
|        |            |        |        | HOMO                 | →    | LUMO+2     | 16     |
|        | 2          | 4.59   | 0.8469 | HOMO-1               | →    | LUMO       | 50     |
|        |            |        |        | HOMO-2               | →    | LUMO       | 18     |
|        |            |        |        | HOMO-2               | →    | LUMO+1     | 14     |
|        | 3          | 4.65   | 0.6865 | HOMO-2               | →    | LUMO       | 36     |
| HOMO   |            |        |        | →                    | LUMO | 22         |        |
| HOMO-1 | →          | LUMO   | 14     |                      |      |            |        |
| NR4    | 1          | 4.18   | 0.1295 | HOMO                 | →    | LUMO+1     | 44     |
|        |            |        |        | HOMO                 | →    | LUMO+2     | 22     |
|        |            |        |        | HOMO                 | →    | LUMO       | 16     |
|        | 2          | 4.59   | 1.4501 | HOMO-1               | →    | LUMO       | 42     |
|        |            |        |        | HOMO-2               | →    | LUMO       | 20     |
|        |            |        |        | HOMO-2               | →    | LUMO+1     | 18     |
| 3      | 4.63       | 1.2945 | HOMO-1 | →                    | LUMO | 30         |        |
|        |            |        | HOMO-2 | →                    | LUMO | 30         |        |
| NR5    | 1          | 4.18   | 0.1438 | HOMO                 | →    | LUMO+1     | 38     |
|        |            |        |        | HOMO                 | →    | LUMO+2     | 28     |
|        |            |        |        | HOMO                 | →    | LUMO+3     | 12     |
|        | 2          | 4.59   | 3.1135 | HOMO-1               | →    | LUMO       | 58     |
|        |            |        |        | HOMO-2               | →    | LUMO+1     | 14     |

Table 4: Valence excitation spectrum of the ZnSe-NRs. Vertical excitation energy and corresponding oscillator strength are reported, along with the composition of the excited state. The first and the most intense transitions are shown for each rod. Energies in eV and oscillator strengths in a.u.. Results obtained at PCM-B3LYP/def2-SVP//PBE/DZ.

| ZnSe |            |       |        |                      |      |            |        |
|------|------------|-------|--------|----------------------|------|------------|--------|
| #    | Transition | E(eV) | f      | Main Monoexcitations |      | Weight (%) |        |
| NR1  | 1          | 3.98  | 0.1135 | HOMO                 | →    | LUMO       | 68     |
|      |            |       |        | HOMO                 | →    | LUMO+1     | 24     |
|      | 7          | 4.62  | 0.5804 | HOMO-4               | →    | LUMO       | 50     |
|      |            |       |        | HOMO-7               | →    | LUMO       | 28     |
| NR2  | 1          | 3.99  | 0.1416 | HOMO                 | →    | LUMO       | 60     |
|      |            |       |        | HOMO                 | →    | LUMO+1     | 42     |
|      |            |       |        | HOMO                 | →    | LUMO+2     | 10     |
|      | 4          | 4.39  | 0.8591 | HOMO-3               | →    | LUMO       | 54     |
|      |            |       |        | HOMO-1               | →    | LUMO       | 24     |
| NR3  | 1          | 4.00  | 0.1733 | HOMO                 | →    | LUMO+1     | 46     |
|      |            |       |        | HOMO                 | →    | LUMO       | 26     |
|      |            |       |        | HOMO                 | →    | LUMO+2     | 18     |
|      | 2          | 4.33  | 1.7800 | HOMO-1               | →    | LUMO       | 74     |
|      | NR4        | 1     | 4.00   | 0.1883               | HOMO | →          | LUMO+1 |
| HOMO |            |       |        |                      | →    | LUMO+2     | 22     |
| HOMO |            |       |        |                      | →    | LUMO       | 18     |
| HOMO |            |       |        |                      | →    | LUMO+3     | 12     |
|      |            | 4.31  | 2.8542 | HOMO-1               | →    | LUMO       | 76     |
| NR5  | 1          | 4.00  | 0.1966 | HOMO                 | →    | LUMO+1     | 38     |
|      |            |       |        | HOMO                 | →    | LUMO+2     | 24     |
|      |            |       |        | HOMO                 | →    | LUMO+3     | 12     |
|      |            |       |        | HOMO                 | →    | LUMO       | 12     |
|      | 2          | 4.29  | 3.7167 | HOMO-1               | →    | LUMO       | 68     |

Table 5: Valence excitation spectrum of the ZnTe-NRs. Vertical excitation energy and corresponding oscillator strength are reported, along with the composition of the excited state. The first and the most intense transitions are shown for each rod. Energies in eV and oscillator strengths in a.u.. Results obtained at PCM-B3LYP/def2-SVP//PBE/DZ.

| ZnTe |            |       |        |                      |        |            |    |
|------|------------|-------|--------|----------------------|--------|------------|----|
| #    | Transition | E(eV) | f      | Main Monoexcitations |        | Weight (%) |    |
| NR1  | 1          | 3.70  | 0.0844 | HOMO                 | →      | LUMO+1     | 72 |
|      |            |       |        | HOMO                 | →      | LUMO       | 12 |
|      | 16         | 4.36  | 0.2967 | HOMO                 | →      | LUMO+8     | 20 |
|      |            |       |        | HOMO-5               | →      | LUMO       | 20 |
|      |            |       |        | HOMO-8               | →      | LUMO       | 14 |
|      |            |       | HOMO-1 | →                    | LUMO+1 | 10         |    |
| NR2  | 1          | 3.70  | 0.0897 | HOMO                 | →      | LUMO+1     | 60 |
|      |            |       |        | HOMO                 | →      | LUMO+2     | 20 |
|      | 8          | 4.13  | 0.6214 | HOMO-4               | →      | LUMO       | 40 |
|      |            |       |        | HOMO-1               | →      | LUMO       | 18 |
|      |            |       | HOMO-6 | →                    | LUMO   | 10         |    |
| NR3  | 1          | 3.71  | 0.1067 | HOMO                 | →      | LUMO+2     | 74 |
|      | 4          | 4.05  | 1.4490 | HOMO-1               | →      | LUMO       | 44 |
|      |            |       |        | HOMO-2               | →      | LUMO       | 22 |
| NR4  | 1          | 3.70  | 0.1101 | HOMO                 | →      | LUMO+2     | 66 |
|      | 3          | 4.03  | 3.5071 | HOMO-1               | →      | LUMO       | 76 |
| NR5  | 1          | 3.71  | 0.1180 | HOMO                 | →      | LUMO+2     | 58 |
|      |            |       |        | HOMO                 | →      | LUMO+3     | 18 |
|      | 3          | 4.00  | 4.8786 | HOMO-1               | →      | LUMO       | 68 |

Table 6: Valence excitation spectrum of the ZnS-NSs. Vertical excitation energy and corresponding oscillator strength are reported, along with the composition of the excited state. Among the low lying excitations, the first an those with  $f > 0.1$  are shown. Energies in eV and oscillator strengths in a.u.. Results obtained at PCM-B3LYP/def2-SVP//PBE/DZ.

| ZnS |              |       |        |                      |         |      |            |    |
|-----|--------------|-------|--------|----------------------|---------|------|------------|----|
|     | # Transition | E(eV) | f      | Main Monoexcitations |         |      | Weight (%) |    |
| NS1 | 1            | 4.16  | 0.0421 | HOMO                 | →       | LUMO | 92         |    |
|     | 2            | 4.42  | 0.4451 | HOMO-1               | →       | LUMO | 92         |    |
|     | 3            |       | 4.47   | 0.2277               | HOMO-2  | →    | LUMO       | 56 |
|     |              |       |        |                      | HOMO-3  | →    | LUMO       | 30 |
|     | 4            |       | 4.50   | 0.1729               | HOMO-3  | →    | LUMO       | 56 |
|     |              |       |        |                      | HOMO-2  | →    | LUMO       | 28 |
|     | 7            |       | 4.63   | 0.1402               | HOMO-6  | →    | LUMO       | 44 |
|     | 10           |       | 4.71   | 0.2371               | HOMO-8  | →    | LUMO       | 40 |
|     |              |       |        |                      | HOMO-7  | →    | LUMO       | 32 |
|     | 12           |       | 4.79   | 0.1022               | HOMO-10 | →    | LUMO       | 28 |
|     |              |       |        |                      | HOMO-11 | →    | LUMO       | 20 |
|     | 14           |       | 4.81   | 0.1627               | HOMO-11 | →    | LUMO       | 26 |
|     |              |       |        |                      | HOMO-10 | →    | LUMO       | 22 |
|     | NS2          | 1     | 4.17   | 0.0361               | HOMO    | →    | LUMO       | 76 |
| 2   |              | 4.40  | 1.0049 | HOMO-1               | →       | LUMO | 79         |    |
| 3   |              |       | 4.47   | 0.1965               | HOMO-2  | →    | LUMO       | 33 |
|     |              |       |        |                      | HOMO-4  | →    | LUMO       | 23 |
|     |              |       |        |                      | HOMO-3  | →    | LUMO       | 20 |
| 5   |              |       | 4.55   | 0.5597               | HOMO-4  | →    | LUMO       | 51 |
| 10  |              |       | 4.64   | 0.3900               | HOMO-7  | →    | LUMO       | 42 |
|     |              |       |        |                      | HOMO-8  | →    | LUMO       | 22 |
| 13  |              |       | 4.68   | 0.1069               | HOMO-10 | →    | LUMO       | 28 |
|     |              |       |        |                      | HOMO-11 | →    | LUMO       | 22 |
| 18  |              | 4.78  | 0.1077 | HOMO-17              | →       | LUMO | 34         |    |
| NS3 | 1            | 4.39  | 1.3280 | HOMO                 | →       | LUMO | 84         |    |
|     | 2            | 4.44  | 0.3098 | HOMO-1               | →       | LUMO | 74         |    |
|     | 4            | 4.48  | 0.9405 | HOMO-3               | →       | LUMO | 54         |    |
|     | 5            | 4.50  | 0.1695 | HOMO-4               | →       | LUMO | 62         |    |
|     | 8            | 4.60  | 0.6378 | HOMO-6               | →       | LUMO | 51         |    |
|     | 9            | 4.60  | 0.1617 | HOMO-7               | →       | LUMO | 59         |    |
|     | 10           | 4.63  | 0.2284 | HOMO-11              | →       | LUMO | 24         |    |
|     | 17           |       | 4.67   | 0.1000               | HOMO-13 | →    | LUMO       | 27 |
|     |              |       |        |                      | HOMO-12 | →    | LUMO       | 24 |
|     | 18           |       | 4.69   | 0.1221               | HOMO-17 | →    | LUMO       | 40 |
| 19  |              | 4.72  | 0.3307 | HOMO-19              | →       | LUMO | 44         |    |

Table 7: Valence excitation spectrum of the ZnSe-NSs. Vertical excitation energy and corresponding oscillator strength are reported, along with the composition of the excited state. The first and the most intense transitions are shown for each wire. Energies in eV and oscillator strengths in a.u.. Results obtained at PCM-B3LYP/def2-SVP//PBE/DZ.

| ZnSe |              |        |         |                      |      |      |            |
|------|--------------|--------|---------|----------------------|------|------|------------|
|      | # Transition | E(eV)  | f       | Main Monoexcitations |      |      | Weight (%) |
| NS1  | 1            | 3.82   | 0.0449  | HOMO                 | →    | LUMO | 93         |
|      | 2            | 4.02   | 0.4719  | HOMO-1               | →    | LUMO | 90         |
|      | 3            | 4.04   | 0.3064  | HOMO-2               | →    | LUMO | 82         |
|      | 7            | 4.25   | 0.1889  | HOMO-6               | →    | LUMO | 73         |
|      | 9            | 4.33   | 0.1335  | HOMO-7               | →    | LUMO | 26         |
|      |              |        |         | HOMO-8               | →    | LUMO | 20         |
|      | 11           | 4.38   | 0.1550  | HOMO-8               | →    | LUMO | 58         |
|      |              |        |         | HOMO-7               | →    | LUMO | 21         |
| 16   | 4.48         | 0.3409 | HOMO-13 | →                    | LUMO | 34   |            |
| NS2  | 1            | 3.83   | 0.0398  | HOMO                 | →    | LUMO | 79         |
|      | 2            | 3.98   | 0.9807  | HOMO-1               | →    | LUMO | 73         |
|      | 3            | 4.05   | 0.1888  | HOMO-2               | →    | LUMO | 47         |
|      | 4            | 4.09   | 0.4261  | HOMO-3               | →    | LUMO | 41         |
|      | 5            | 4.09   | 0.1412  | HOMO-4               | →    | LUMO | 61         |
|      | 7            | 4.17   | 0.1170  | HOMO-6               | →    | LUMO | 70         |
|      | 9            | 4.23   | 0.2212  | HOMO-7               | →    | LUMO | 38         |
|      | 12           | 4.28   | 0.1440  | HOMO-9               | →    | LUMO | 32         |
|      | 13           | 4.31   | 0.1308  | HOMO-11              | →    | LUMO | 24         |
|      |              |        |         | HOMO-10              | →    | LUMO | 21         |
| NS3  | 1            | 3.91   | 1.0659  | HOMO                 | →    | LUMO | 84         |
|      | 2            | 3.95   | 0.6319  | HOMO-1               | →    | LUMO | 81         |
|      | 4            | 4.01   | 0.8026  | HOMO-3               | →    | LUMO | 69         |
|      | 9            | 4.17   | 0.4697  | HOMO-8               | →    | LUMO | 58         |
|      | 10           | 4.19   | 0.1971  | HOMO-10              | →    | LUMO | 46         |
|      |              |        |         | HOMO-9               | →    | LUMO | 24         |
|      | 12           | 4.23   | 0.2528  | HOMO-12              | →    | LUMO | 37         |
| 16   | 4.27         | 0.5158 | HOMO-15 | →                    | LUMO | 48   |            |

Table 8: Valence excitation spectrum of the ZnTe-NSs. Vertical excitation energy and corresponding oscillator strength are reported, along with the composition of the excited state. The first and the most intense transitions are shown for each wire. Energies in eV and oscillator strengths in a.u.. Results obtained at PCM-B3LYP/def2-SVP//PBE/DZ.

| ZnTe   |            |        |        |                      |          |            |
|--------|------------|--------|--------|----------------------|----------|------------|
| #      | Transition | E(eV)  | f      | Main Monoexcitations |          | Weight (%) |
| NS1    | 1          | 3.39   | 0.0434 | HOMO                 | → LUMO   | 91         |
|        | 3          | 3.61   | 0.4011 | HOMO-1               | → LUMO   | 78         |
|        | 4          | 3.63   | 0.3805 | HOMO-2               | → LUMO   | 60         |
| NS2    | 1          | 3.39   | 0.0451 | HOMO                 | → LUMO   | 74         |
|        | 3          | 3.61   | 1.1188 | HOMO-1               | → LUMO   | 83         |
|        | 4          | 3.65   | 0.5492 | HOMO-2               | → LUMO   | 50         |
|        |            |        |        | HOMO-3               | → LUMO   | 35         |
|        | 7          | 3.71   | 0.1520 | HOMO-5               | → LUMO   | 43         |
|        |            |        |        | HOMO-4               | → LUMO   | 29         |
|        | 11         | 3.80   | 0.1410 | HOMO-7               | → LUMO   | 26         |
|        | 14         | 3.84   | 0.1253 | HOMO-8               | → LUMO   | 35         |
| 15     | 3.84       | 0.1151 | HOMO-9 | → LUMO               | 44       |            |
| NS3    | 1          | 3.37   | 0.2895 | HOMO                 | → LUMO   | 41         |
|        |            |        |        | HOMO                 | → LUMO+1 | 38         |
|        | 2          | 3.48   | 0.9490 | HOMO                 | → LUMO   | 41         |
|        |            |        |        | HOMO-1               | → LUMO   | 24         |
|        | 4          | 3.54   | 0.2287 | HOMO-2               | → LUMO   | 55         |
|        | 6          | 3.66   | 0.5662 | HOMO-3               | → LUMO   | 55         |
|        | 7          | 3.66   | 0.1332 | HOMO-4               | → LUMO   | 62         |
|        | 8          | 3.67   | 0.2003 | HOMO-5               | → LUMO   | 31         |
|        | 9          | 3.68   | 0.1456 | HOMO-2               | → LUMO+1 | 24         |
|        | 10         | 3.70   | 0.4947 | HOMO-5               | → LUMO   | 22         |
|        | 14         | 3.76   | 0.1370 | HOMO-10              | → LUMO   | <10        |
|        | 15         | 3.77   | 0.4572 | HOMO-12              | → LUMO   | 24         |
| HOMO-8 |            |        |        | → LUMO               | 23       |            |



Figure 1: TDDFT absorption spectra of the ZnS-NW1 at different levels, obtained by a Gaussian convolution the lowest 10 electronic transitions. The TDDFT absorption spectra calculated at PCM(water)-B3LYP/def2-SVP for the structures optimized at PBE/DZ and B3LYP/DZ differ only slightly, being the latter 0.05-0.10 eV redshifted with respect to the former. The spectra of the structure optimized with the COSMO representation of the solvent are consistently redshifted by only 0.10 eV as compared to the structure minimized *in vacuo*. For PBE, the spectra of the structures obtained in water and in acetonitrile are almost indistinguishable.

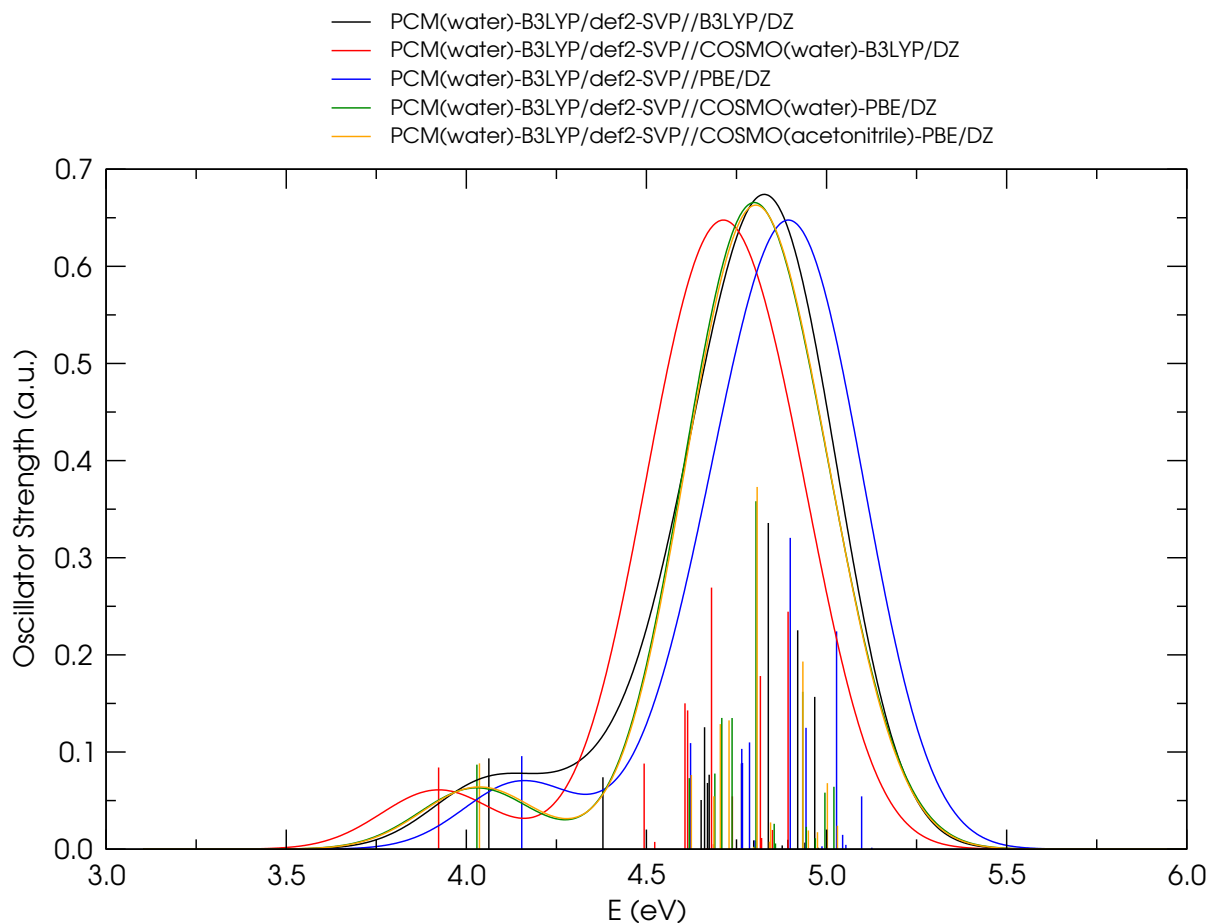

Figure 2: Geometrical structures of the optimized (a) ZnO-, (b) ZnS-, (c) ZnSe- and (d) ZnTe- QDs. In the case of the ZnO-QD, perspectives along the *a*, *b* and *c* crystallographic axes are shown. Light blue = Zn, red = O, yellow = S, orange = Se, green = Te and white = H atoms.

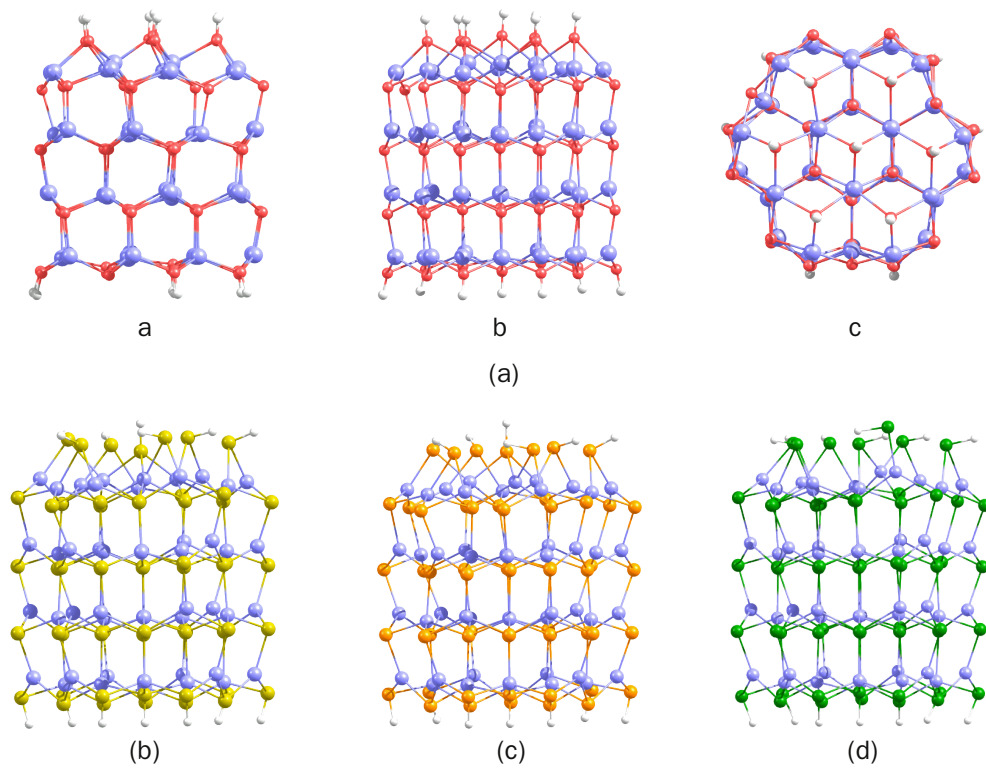

Figure 3: RDFs of the (a) ZnO-, (b) ZnS-, (c) ZnSe- and (d) ZnTe- QDs. The upper and the lower part of each panel show the structure of the optimized  $(\text{ZnX})_{48}(\text{H}_2\text{X})_7$  QD and the unrelaxed  $(\text{ZnX})_{48}$ , respectively. For sake of clarity, surface attached  $\text{H}_2\text{X}$  molecules have not been considered in the former.

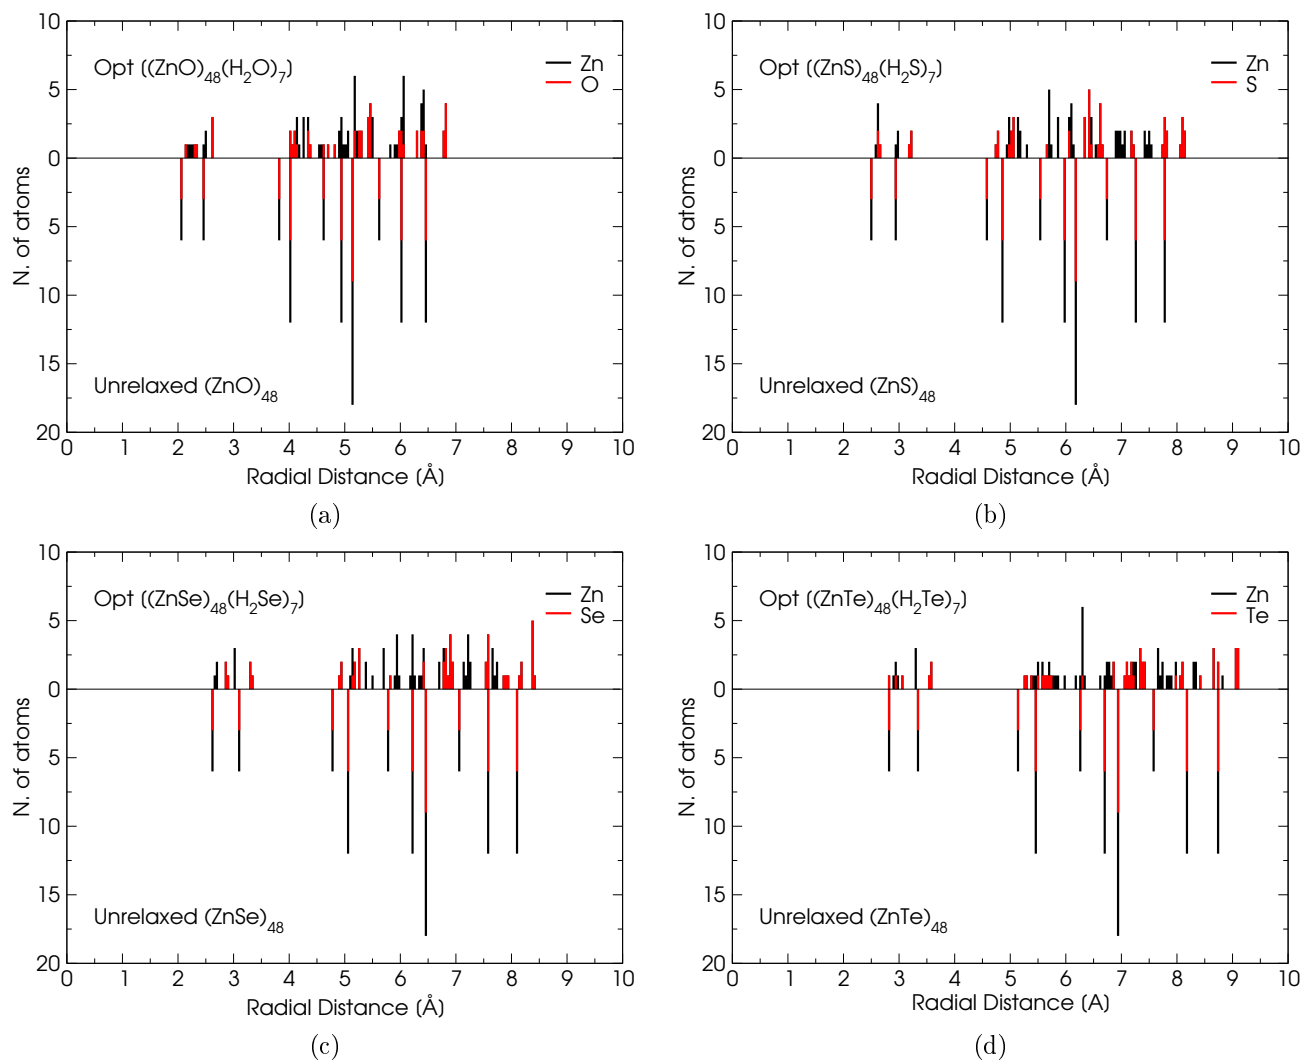

Figure 4: Density of States (DOS) of (a) ZnS-, (b) ZnSe and (c) ZnTe- NRs, obtained by a Gaussian broadening of  $\sigma = 0.20$  eV of the individual Kohn-Sham orbitals. The insets show the detail of the electronic structure at the edges of the bandgap. Results obtained at PCM-B3LYP/def2-SVP//PBE/DZ.

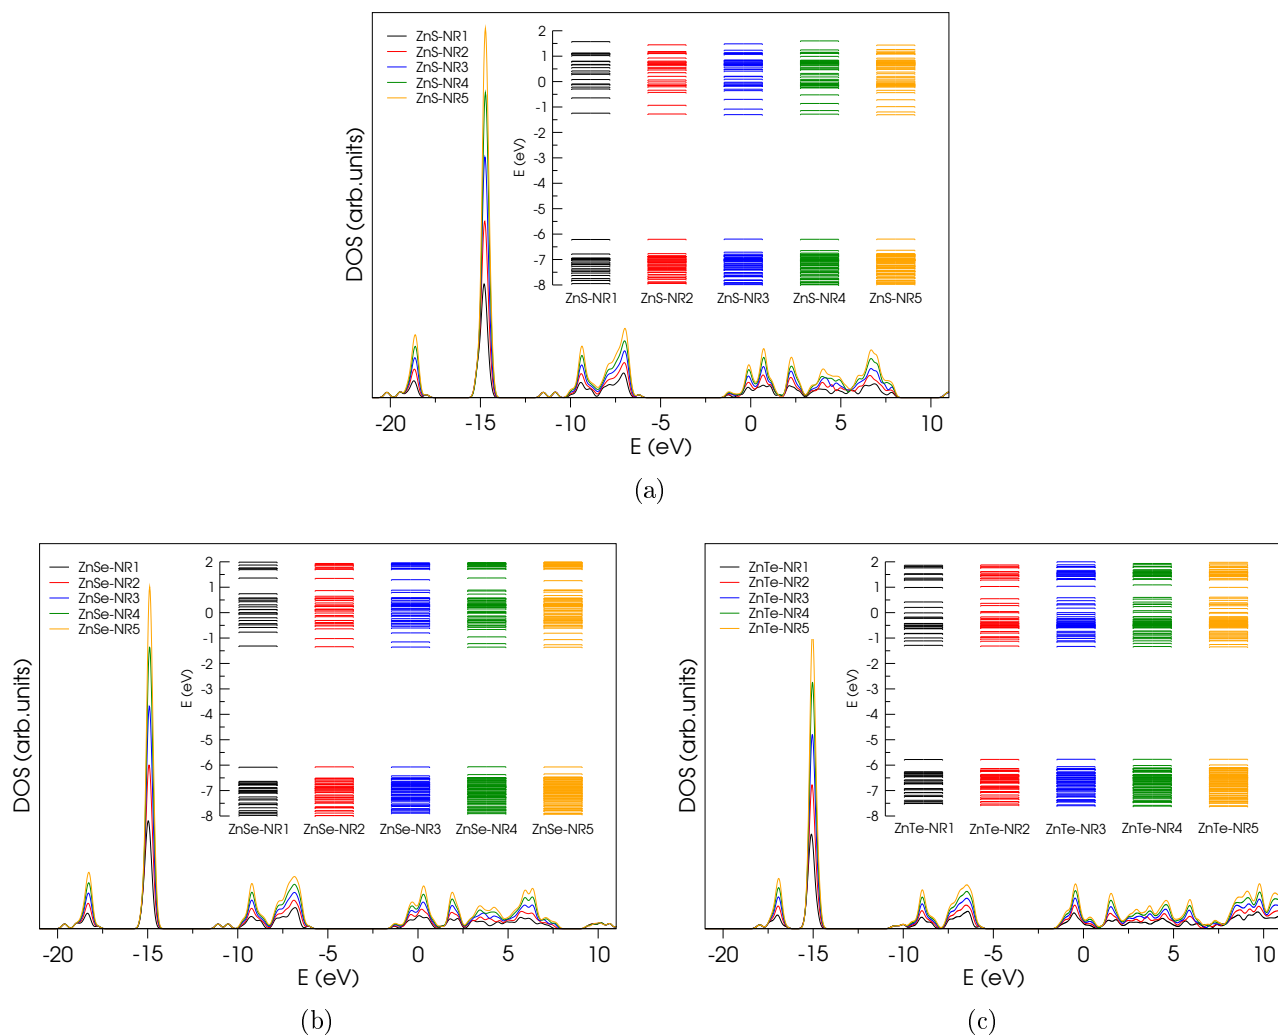

Figure 5: Optimized geometrical structures of the ZnS-NSs and isodensity plots of the HOMO-1, HOMO and LUMO. Light blue = Zn, yellow = S and white = H atoms.

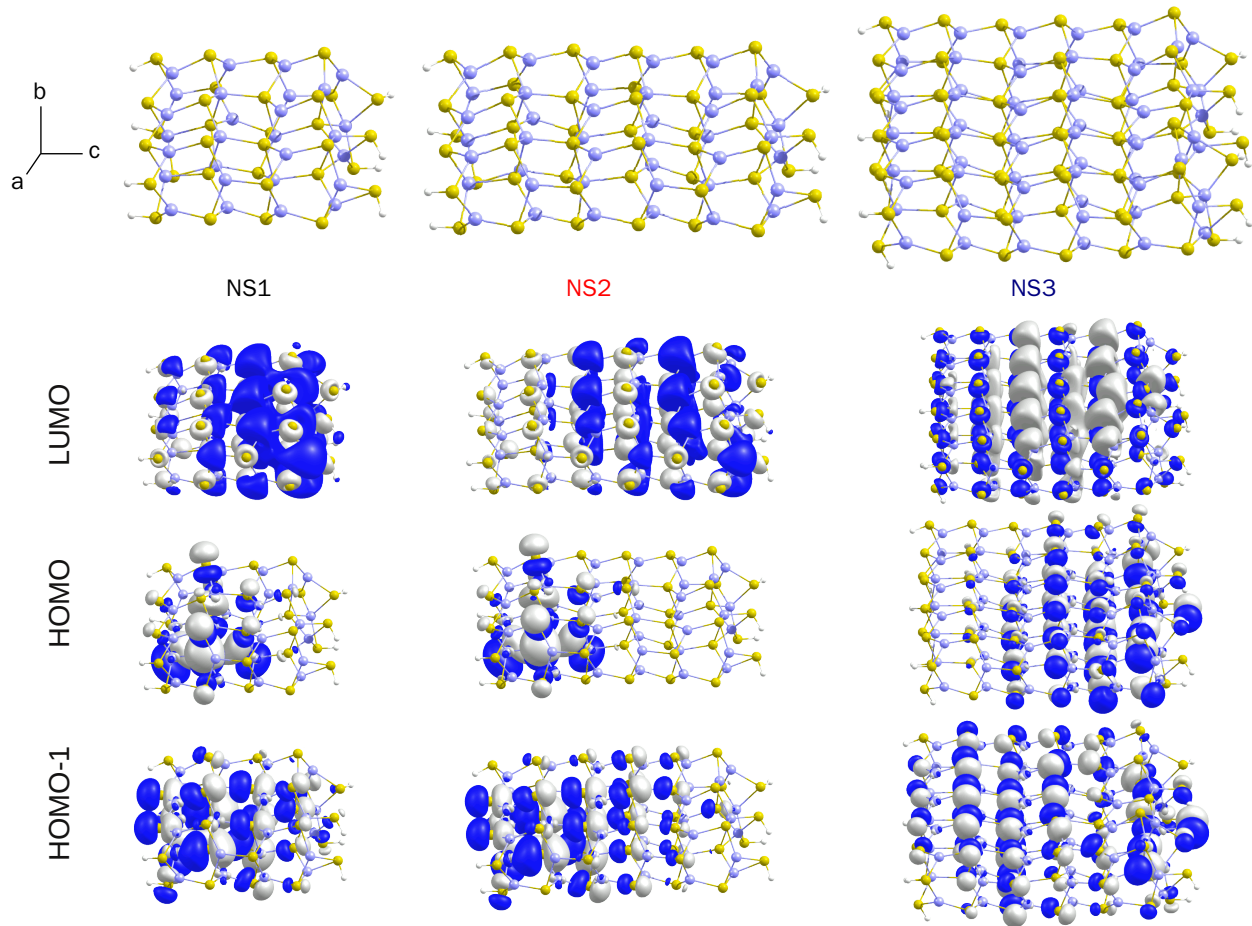

Figure 6: Density of States (DOS) of (a) ZnSe- and (b) ZnTe- NSs, obtained by a Gaussian broadening of  $\sigma = 0.20$  eV of the individual Kohn-Sham orbitals. For NS1 and NS2 HOMO-1 has been chosen as VBM, given that HOMO is a midgap state. Results obtained at PCM-B3LYP/def2-SVP//PBE/DZ.

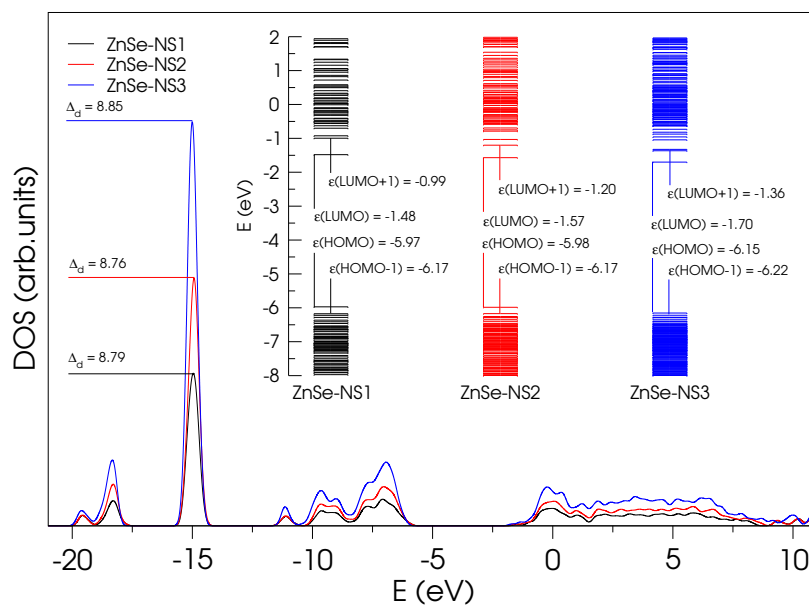

(a)

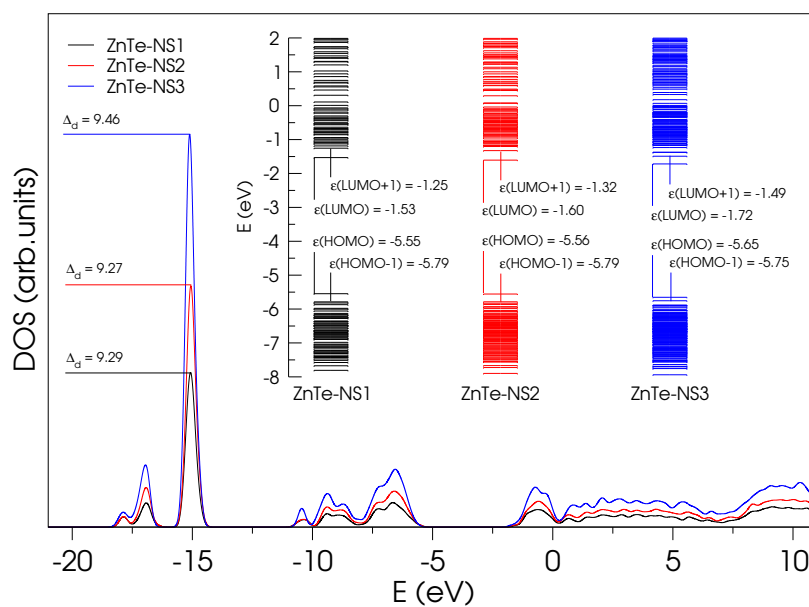

(b)

Figure 7: Calculated TDDFT absorption spectra for ZnSe-NSs, obtained by a Gaussian convolution with FWHM of 0.47 eV, calculated taking into account the lowest 20 excited states. Results obtained at PCM-B3LYP/def2-SVP//PBE/DZ.

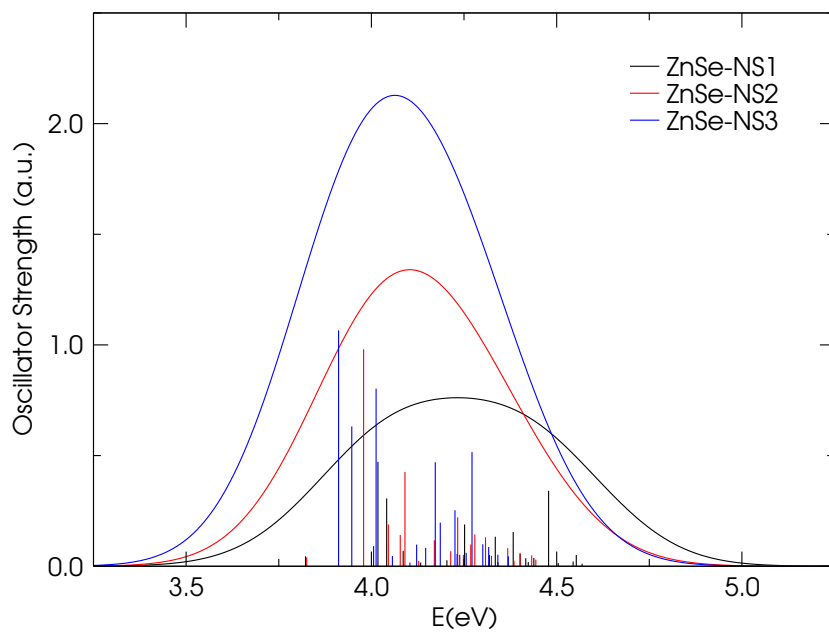

Figure 8: Calculated TDDFT absorption spectra for ZnTe-NSs, obtained by a Gaussian convolution with FWHM of 0.47 eV, calculated taking into account the lowest 20 excited states. Results obtained at PCM-B3LYP/def2-SVP//PBE/DZ.

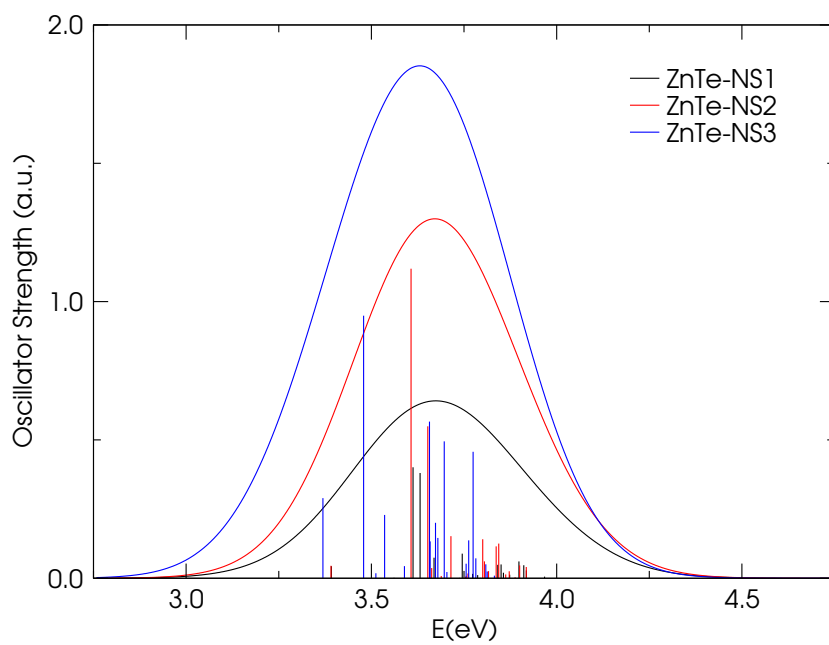

Supplement: c2jm33744d.pdf [file c2jm33744d.pdf]
